# Supplementary material for: Perspective on oligomeric products from lignin depolymerization: their generation, identification, and further valorization
Source: Royal Society of Chemistry journal article supplement (doi:10.1039/d2im00059h), 2023-01-01
Supplement: d2im00059h1.pdf [file d2im00059h1.pdf]

Supplementary information:

## **Perspective on Oligomeric Products from Lignin Depolymerization: Its Generation, Identification, and further Valorization**

**Yinglei Han<sup>1,2</sup>, Blake A. Simmons<sup>1,3</sup>, Seema Singh<sup>1,2,\*</sup>**

<sup>1</sup> Deconstruction Division, Joint Bioenergy Institute, 5885 Hollis Street, Emeryville, CA 94608, USA

<sup>2</sup> Department of Bioresource and Environmental Security, Sandia National Laboratories, 7011 East Avenue, Livermore, CA 94551, USA

<sup>3</sup> Biological Systems and Engineering Division, Lawrence Berkeley National Laboratory, 1 Cyclotron Road, Berkeley, CA 94720, USA

\* correspondence: [ssingh@lbl.gov](mailto:ssingh@lbl.gov)

To make each reference in Fig.1,3, and 4 easily being tracked, detail information about each reference (condition, catalyst, paper title and year) in Fig.1,3 and 4 is listed in table S1, S3, and S4, respectively.

**Table S1 References used to build Fig.1**

| Table S1 ( All references used to build Fig.1) |             |                                           |             |           |                    |          |                              |                                                                                                                                        |  |  |
|------------------------------------------------|-------------|-------------------------------------------|-------------|-----------|--------------------|----------|------------------------------|----------------------------------------------------------------------------------------------------------------------------------------|--|--|
| RCD                                            | ref# in nev | Ref for RCD                               | Monomer:    | Oligomers | Best Condition     | Cat/Feed | Paper title                  |                                                                                                                                        |  |  |
| 2014                                           | 39          | 8 Alkali lignin from wheat straw          | 23          | 63        | CuMgAlOx 300C      | 4h       | Ethanol 10 bar H2 0.5/1      | Catalytic Depolymerization of Lignin in Supercritical                                                                                  |  |  |
| 2015                                           | 40          | 17 bamboo Lignin                          | 27.9        | 72.1      | Raney Ni+ 270C     | 0.5h     | Methanol/1bar N2 1+1/1       | Depolymerization of Cellulolytic Enzyme Lignin for the Production of                                                                   |  |  |
| 2015                                           | 41          | 19 organosolv lignin                      | 10.9        | 90.1      | Ni7Au3 160C        | 2h       | NaOH/H2(10 bar H2 0.4/1      | Base promoted hydrogenolysis of lignin model compounds and organosolv lignin over metal catalysts in water                             |  |  |
| 2016                                           | 42          | 21 Hartwig, (miscanthus giganteus lignin) | 15.1        | 67        | 10% Pd/C 200C      | 24h      | dioxane 1bar H2              | Fragmentation of Lignin Samples with Commercial Pd/C under                                                                             |  |  |
| 2015                                           | 19          | 24 Van den Bosch, (Birch)                 | 51.5 (C yie | 48.5      | 5% Ru/C 250C       | 6h       | Methanol 30bar H2 0.15/1     | Reductive Lignocellulose Fractionation into                                                                                            |  |  |
| 2013                                           | 24          | 30 EtOH/Benzene treated Birch             | 54          | 46        | 10% Ni/C 200C      | 6h       | Methanol 1 bar Ar 0.05/1     | Lignin Depolymerization (LDP) in alcohol over nickel                                                                                   |  |  |
| 2015                                           | 43          | 31 Poplar lignin                          | 54          | 46        | 5% PdZn1C 225C     | 12h      | Methanol 34.5 bar H.0.1/1    | A Synergistic biorefinery based on catalytic conversion of lignin                                                                      |  |  |
| 2015                                           | 21          | 32 Birch lignin                           | 32          | 68        | 10%Ni/C 200C       | 6h       | Methanol 2bar N2 0.1/1       | Lignin Depolymerization over Ni/C catalyst in methanol,                                                                                |  |  |
| 2016                                           | 44          | 34 miscanthus lignin                      | 68          | 32        | 10%Ni/C 225C       | 12h      | Methanol 60 bar H2 0.15/1    | Total Utilization of Miscanthus Biomass, Lignin and Carbohydrates                                                                      |  |  |
| 2016                                           | 45          | 39 beech lignin                           | 51.4        | 48.6      | 10%Ni/C 200C       | 5h       | Methanol/60bar H2 0.1/1      | High Yield Productionof NaturalPhenolicAlcoholsfromWoody BiomassUsingaNickel-BasedCatalyst                                             |  |  |
| 2016                                           | 46          | 40 Poplar lignin                          | 43.5        | 56.5      | Pd/C 200C          | 3h       | Methanol/20 bar H2 0.1/1     | Synergetic Effects of Alcohol/Water Mixing on the Catalytic Reductive Fractionation of Poplar Wood                                     |  |  |
| 2015                                           | 30          | 41 Birch lignin                           | 43.8        | 56.2      | Pd/C 200C          | 3h       | H2O 30 bar H2 0.1/1          | Influence of bio-based solvents on the catalytic reductive fractionation of birch wood†                                                |  |  |
| 2016                                           | 31          | 42 Corn stover lignin                     | 24.5        | 75.5      | 10%Ni/C 200C       | 3h       | Methanol/30 bar H2 0.1/1     | Reductive Catalytic Fractionation of Corn Stover Lignin                                                                                |  |  |
| 2017                                           | 47          | 43 Birch lignin                           | 55          | 45        | Pd/C+Al(O 180C     | 2h       | Methanol/30 bar H2 0.1/1     | Reductive fractionation of woody biomass into lignin monomers and cellulose by tandem metal triflate and Pd/C catalysi                 |  |  |
| 2017                                           | 48          | 44 Birch lignin                           | 39.5        | 60.5      | NiFe/C 200C        | 6h       | Methanol 20 bar H2 0.5/1     | Depolymerization of lignin via a non-precious Ni–Fe alloy catalyst supported on act                                                    |  |  |
| 2017                                           | 49          | 45 Birch lignin                           | 36          | 64        | Ni/Al2O3 250C      | 3h       | Methanol 30 bar H2 0.1/1     | Integrating lignin valorization and bio-ethanol production: on the role of Ni–Al2O3 catalyst pellets during lignin-first fractionation |  |  |
| 2017                                           | 50          | 46 Birch lignin                           | 37          | 63        | Pd/C+H3P1 180C     | 3h       | Methanol/30 bar H2 Flow      | Lignin depolymerization to monophenolic compounds in a flow-through system                                                             |  |  |
| 2017                                           | 51          | 47 Birch lignin                           | 35.5        | 64.5      | Ru/Nb2O5 250C      | 20h      | H2O 7 bar H2 2/1ratio        | Selective Production of Arenes via Direct Lignin Upgrading over a Niobium                                                              |  |  |
| 2017                                           | 52          | 48 Birch lignin                           | 33          | 30        | MoOx/CN 260C       | 4h       | Methanol 30 bar H2 0.1/1     | Catalytic Hydrogenolysis of Lignins into Phenolic Compounds over                                                                       |  |  |
| 2018                                           | 53          | 49 Poplar (26% lignin)                    | 19.7        | 80.3      | Ni/C 200C          | 1h       | Methanol 30 bar H2 0.2/1     | Kinetic Studies of Lignin Solvolysis and Reduction by Reductive Catalytic Fractionation Decoupled in Flow-Through Reactors             |  |  |
| 2019                                           | 54          | 50 Birch                                  | 46.1        | 53.9      | Pt(1%)/gar 230C    | 3h       | Methanol/30 bar N2 0.25/1    | Catalytic Conversion of Lignin in Woody Biomass into Phenolic Monomers in Methanol/Water Mixtures without External Hydrogen            |  |  |
| 2020                                           | 55          | 51 Eucalyptus lignin                      | 44.1        | 38.9      | Pd/C 180C          | 4h       | Metahnol 30 bar H2           | UnlockingStructure–ReactivityRelationshipsfor Catalytic                                                                                |  |  |
| 2021                                           | 8           | 52 lignin acid extracted from corn stover | 35.53       | 54.03     | NiFeMo2C 260C      | 4h       | water/Me130 bar H2 1/1ratio  | Selective production of phenolic monomers via high efficient lignin                                                                    |  |  |
| 2021                                           | 56          | 53 Corncob lignin                         | 27.12       | 59.23     | Ru/CNT-N 250C      | 24h      | Methanol 10 bar H2 0.2/1     | Hydrogenolysis of lignin to phenolic monomers over Ru based catalysts                                                                  |  |  |
| 2022                                           | 57          | 54 Poplar                                 | 40          | 60        | Pd/TiO2 180C       | 6h       | H2O Ar 0.1/1                 | Self-hydrogen transfer hydrogenolysis of native lignin over Pd-PdO/TiO2                                                                |  |  |
| 2022                                           | 58          | 55 Cornstalk lignin                       | 31.2        | 49.5      | Ru/N dope 260C     | 4h       | Ethanol 10 bar H2 0.4/1      | Hydrogenolysis of cornstalk lignin in supercritical ethanol over N-doped                                                               |  |  |
| OCD                                            |             | Ref for RCD                               |             |           |                    |          |                              |                                                                                                                                        |  |  |
| 2017                                           | 17          | 56 Japanese cedar                         | 22.5        | 77        | Bu4NOH.3 air, 120C | 43h      | Bu4NOH.3 air, 1 bar 7mg/1    | Tetrabutylammonium Hydroxide 30-Hydrate as Novel Reaction                                                                              |  |  |
| 2009                                           | 59          | 57 Cornstalk lignin                       | 18.1        | 22.9      | LaCoO3 120C        |          | H2O, NaO15 bar O2            | Activity and Stability of Perovskite-Type Oxide LaCoO3 Catalyst in                                                                     |  |  |
| 2010                                           | 60          | 58 Beech lignin                           | 32.5        | 33.8      | Mn(NO3)2 100C      | 24h      | EMIM[CF3 17 bar O2 Air       | Oxidative Depolymerization of Lignin in Ionic Liquids                                                                                  |  |  |
| 2013                                           | 61          | 59 mixed hardwood lignin                  | 29.5        | 70.5      | CuSO4 175C         | 1.5h     | ionic liquid25 Bar O2 1/100  | Process of lignin oxidation in an ionic liquid coupled                                                                                 |  |  |
| 2018                                           | 62          | 60 corn stover lignin                     | 49          | 51        | CuO 175C           |          | NaOH/H2(5 bar O2             | Revisiting alkaline aerobic lignin oxidation                                                                                           |  |  |
| 2021                                           | 32          | 61 Poplar                                 | 15          | 56        | Co-PANI-C 190C     | 12h      | ACETONE 2.5 bar O2           | Oxidative Catalytic Fractionation of Lignocellulosic Biomass under                                                                     |  |  |
| 2020                                           | 63          | 62 Red oak                                | 10.5        | 89.5      | No 250C            | 10min    | perfluorod20 bar O2          | Non-catalytic oxidative depolymerization of lignin                                                                                     |  |  |
| 2013                                           | 64          | 63 Pyrolytic lignin                       | 66          | 34        | H5PMo10 190C       | 1h       | water/Me12 bar O2            | Depolymerization of lignin by catalytic oxidation                                                                                      |  |  |
| 2021                                           | 65          | 64 Poplar lignin                          | 28.1        | 45.9      | PMo12 100C         | 2h       | Methanol 9 bar O2            | Oxidative Catalytic Fractionation and Depolymerization of Lignin in                                                                    |  |  |
| 2011                                           | 66          | 65 organosolv lignin                      | 18          | 45        | 160C               |          | 1:3Lignin/30%H2O2            | Selective Production of Organic Acids and Depolymerization of Lignin by Hydrothermal                                                   |  |  |
| 2019                                           | 67          | 66 Poplar lignin                          | 8.06        | 85.02     | Phosphotu 250C     | 6h       | Ethanol/W1:4Lignin/30%H2O2   | A Comparison of Phenolic Monomers Produced from Different Types of Lignin by Phosphotungstic Acid                                      |  |  |
| 2022                                           | 68          | 67 alkaline lignin                        | 40.97       | 59.03     | 100C               | 2h       | IL 11.5 bar O2               | Enhanced oxidative depolymerization of lignin in                                                                                       |  |  |
| 2020                                           | 34          | 68 kraft lignin                           | 10.47       | 71.83     | FeCl3 100C         | 4h       | Methanol 10 bar O2           | Low temperature lignin depolymerization to aromatic compounds                                                                          |  |  |
| 2020                                           | 69          | 69 kraft lignin                           | 17          | 83        | CuMn 180C          |          | 1:3Lignin/30%H2O2            | Alkaline wet oxidation of lignin over Cu-Mn mixed oxide catalysts                                                                      |  |  |
| 2016                                           | 70          | 70 alkaline lignin                        | 17.92       | 68.62     | NaOH 150C          | 1h       | Methanol 1:6.6Lignin/30%H2O2 | Effect of solvent on hydrothermal oxidation depolymerization of lignin                                                                 |  |  |
| 2021                                           | 71          | 71 alkaline lignin                        | 30.5        | 69.5      | CuSO4 160C         | 45MIN    | NaOH/H2(5 bar O2             | From Lignin to Valuable Aromatic Chemicals: Lignin Depolymerization and Monomer                                                        |  |  |

Table S3 References used to build Fig.3

| Table S3 ( All references used to build Fig.3) |                                         | Maldi                                       | GPC              | FT-ICR-MS  |     | Ref in now Title                                                   |                                                                                                                                    |
|------------------------------------------------|-----------------------------------------|---------------------------------------------|------------------|------------|-----|--------------------------------------------------------------------|------------------------------------------------------------------------------------------------------------------------------------|
|                                                |                                         | Main inter Range                            | Average (M Range | Mw         | DBE |                                                                    |                                                                                                                                    |
| OCD                                            | [Ref 110] 100°C, NaOH, 10bar O2         | 100C, 2h, NaOH, kraft ligin, 10bar O2,      |                  |            | 282 | 7.53                                                               | 110 Base-catalyzed oxidative depolymerization of softwood kraft lignin                                                             |
|                                                | [Ref 7] 110°C, HCO2H/HCO2Na             | 110C, TEM 243-434 200-700                   |                  |            |     |                                                                    | 7 Valorization of Lignin: Effective Conversion of Depolymerized Lignin to Oil by Simple Chemical Modifications                     |
|                                                | [Ref 33] 135°C, Cu(NO3)2, pyridine      | 135C, V(acac)3, Cu(NO3)2.3H2O, 300          |                  |            |     |                                                                    | 33 Copper- and Vanadium-Catalyzed Oxidative Cleavage of Lignin using Dioxygen                                                      |
| RCD                                            | [Ref 116] 150°C, CuSO4, H2O2            | 150C, 1.5h, CuSO4, H2O2, Kraft lig          | 400              |            |     |                                                                    | 116 CuSO4/H2O2-Catalyzed Lignin Depolymerization under the Irradiation of Microwaves                                               |
|                                                | [Ref 117] 150°C, Ru/C, PL, 35 bar H2    | 150C, 3h, Ru/C, pyrolytic lignin, f         | 726              |            | 631 |                                                                    | 117 Functionality and molecular weight distribution of red oak lignin before and after pyrolysis and hydrogenation                 |
|                                                | [Ref 55] 180°C, Pd/C, 30 bar H2         | 180C, 4h, Pd/C, MeOH, 3MPa H2               | 515              |            |     |                                                                    | 55 Unlocking Structure-Reactivity Relationships for Catalytic Hydrogenolysis of Lignin into Phenolic Monomers                      |
|                                                | [Ref 114] 180°C, isopropanol            | 180C, 0.5h 300-500 300-500                  |                  |            |     |                                                                    | 114 Lignin depolymerization to aromatic monomers and oligomers in                                                                  |
|                                                | [Ref 113] 190°C, Pd/C, isopropanol      | 190C, 5h, f 279-399 200-500                 | 700              | 100-5000Da |     |                                                                    | 113 Highly efficient catalytic transfer hydrogenolysis for the conversion of Kraft lignin into bio-oil over heteropoly acids       |
|                                                | [Ref 118] 220°C, Ni/MSN, 20 bar H2      | 220C, 5h, Ni/MSN-AI, MeOH, 2M               | 1000             |            |     |                                                                    | 118 Immobilized Ni Clusters in Mesoporous Aluminum Silica Nanospheres for Catalytic Hydrogenolysis of Lignin                       |
|                                                | [Ref 119] 225°C, ethanol                | 225C, 1h, e 302-480                         |                  |            |     |                                                                    | 119 Hybrid microwave-ultrasound assisted catalyst-free depolymerization of Kraft lignin to bio-oil                                 |
|                                                | [Ref 120] 270°C, Pd/C, DES-EL           | 270C, 1h, DES-EL, Pd/C, DES-ligni           | 570              |            |     |                                                                    | 120 Characterization and Catalytic Transfer Hydrogenolysis of Deep Eutectic Solvent Extracted Sorghum Lignin to Phenolic Compounds |
|                                                | [Ref 109] 300°C, Cu/Cu/ZnAlOx,          | 300C, 8h, Cu/CuZnAlOx, lignin oil           |                  |            | 340 | 6.5                                                                | Production of oxygen-containing fuels via supercritical methanol hydrodeoxygenation of lignin bio-oil over Cu/CuZnAlOx catalyst    |
|                                                | [Ref 9] 300°C, Ni/HZSM-5                | 300C, 4h, f 320-379 300-700                 |                  |            |     |                                                                    | 9 Catalytic depolymerization of organosolv lignin to phenolic monomers and low molecular weight oligomers                          |
|                                                | [Ref 121] 360°C, SA-Cu/CuMgAlOx,        | 360C, 8h, f 272-452 200-900                 | 433              | 10-2000Da  |     |                                                                    | 121 Production of Jet Fuel Precursors from Waste Kraft Lignin with a Complex Copper Acid Catalyst                                  |
| Pyrolysis                                      | [Ref 111] 500°C, 10 min, 0.1g/min       | 500C, residence time 10min, 0.1g/min lignin |                  |            | 311 | 7.54                                                               | An insight into the OPAHs and SPAHs formation mechanisms during alkaline lignin pyrolysis at different temperatures                |
|                                                | [Ref 122] 500°C, 5 ton/h, precipitation | 500C, 5ton/h, pine wood, water e            | 690              |            |     |                                                                    | 122 In-depth structural characterization of the lignin fraction of a pine-derived pyrolysis oil                                    |
|                                                | [Ref 123] 500°C, straw, precipitation   | 500C, rice straw, water precipita           | 998              |            |     |                                                                    | Characterization of pyrolytic lignin and insight into its formation mechanisms using novel techniques and DFT method               |
|                                                | [Ref 124] 550°C, red oak, 6kg/h         | 550C, red oak, 6kg/h                        | 831              |            | 668 |                                                                    | The effect of pyrolysis temperature on recovery of bio-oil as distinctive stage fractions                                          |
| [Ref 98] 600°C, 10min, zeolites                | 600C, 10min, zeolites, kraft lignin     | 320                                         |                  |            |     | One step thermal conversion of lignin to the gasoline range liquid |                                                                                                                                    |

Table S4 References used to build Fig.4

| Table S4 ( All references used to build Fig.4) |     | Title                                                                                                                                                    |
|------------------------------------------------|-----|----------------------------------------------------------------------------------------------------------------------------------------------------------|
| Ref 133(OCF)                                   | 133 | Depolymerization of Lignin to Aromatics by Selectively Oxidizing Cleavage of C-C and C-O Bonds Using CuCl2/Polybenzoxazine Catalysts at Room Temperature |
| Ref 65 (OCF)                                   | 65  | Oxidative Catalytic Fractionation and Depolymerization of Lignin in a One-Pot Single-Catalyst System                                                     |
| Ref 33(OCF)                                    | 33  | Copper- and Vanadium-Catalyzed Oxidative Cleavage of Lignin using Dioxygen                                                                               |
| Ref 97(RCF)                                    | 97  | Catalytic Biorefining of Plant Biomass to Non-Pyrolytic Lignin Bio-Oil and Carbohydrates through Hydrogen Transfer Reactions                             |
| Ref 118 (RCF)                                  | 118 | Immobilized Ni Clusters in Mesoporous Aluminum Silica Nanospheres for Catalytic Hydrogenolysis of Lignin                                                 |
| Ref 134 (RCF)                                  | 134 | Tungsten-based catalysts for lignin depolymerization: the role of tungsten species in                                                                    |
| Ref 117 (Pyrolysis)                            | 117 | Functionality and molecular weight distribution of red oak lignin before and after pyrolysis and hydrogenation                                           |
